# Supplementary material
Source: publisher figshare collection journal article supplement (https://tandf.figshare.com/ndownloader/files/16459610)
Supplement: Supplementary file 1 [file 16459610]

**Supplementary table**

Table S1. The NOS activity (nmole min-1 mg-1 protein) of supernatant of *W. cibaria* X31, *L. fermentum* JCM1173 and IFO3956 at different concentrations of L-NAME.

Tabla S1. La actividad NOS (nmole min-1 mg-1 proteína) del sobrenadante de *W. cibaria* X31, *L. fermentum* JCM1173 e IFO3956 a diferentes concentraciones de L-NAME.

| L-NAME concentration (μM) | X31 | JCM1173 | IFO3956 |
| --- | --- | --- | --- |
| 0 | 0.352±0.011d | 0.118±0.005d | 0.305±0.013d |
| 50 | 0.181±0.012c | 0.075±0.004c | 0.235±0.009c |
| 100 | 0.164±0.006b | 0.072±0.002 c | 0.221±0.011c |
| 400  1000 | 0.167±0.006bc  0.109±0.002a | 0.064±0.002b  0.037±0.003a | 0.196±0.011b  0.131±0.006a |

JCM1173, X31, IFO3956: groups inoculated with cultures of *L. fermentum* JCM1173, *W. cibaria* X31, and *L. fermentum* IFO3956 at a concentration of 8 log CFU/g, respectively. All values are given as means ± standard deviation from triplicate determinations. Significant difference of the data in the same column is indicated with different lowercase letters (P < 0.05).

JCM1173, X31, IFO3956: grupos inoculados con cultivos de *L. fermentum* JCM1173, *W. cibaria* X31 y *L. fermentum* IFO3956 a una concentración de 8 log CFU/g, respectivamente. Todos los valores se presentan como medias ± desviación estándar de las determinaciones por triplicado. Las diferencias significativas entre los datos en la misma columna se indica con letras minúsculas diferentes (P <0.05).

Table S2. The total NO production (Fluo · unit / 108 cfu) of three experimental groups *L. fermentum* JCM1173, *L. fermentum* IFO3956 and *W.* *cibaria* X31.

Tabla S2. La producción total de NO (unidad de flujo/108 cfu) de tres grupos experimentales *L. fermentum* JCM1173, *L. fermentum* IFO3956 y *W. cibaria* X31.

| Group | None | NOS | NR | NOS+NR | NR(%) | NOS(%) |
| --- | --- | --- | --- | --- | --- | --- |
| JCM1173 | 1.06±0.06 | 0.81±0.04 | 0.39±0.03 | 0.16±0.02 | 61.32 | 21.70 |
| IFO3956 | 0.92±0.03 | 0.73±0.04 | 0.41±0.01 | 0.18±0.01 | 59.78 | 25.00 |
| X31 | 1.25±0.04 | 0.37±0.02 | 0.98±0.04 | 0.21±0.01 | 12.80 | 61.60 |

NR(%)=NOS-(NOS+NR)/None

NOS(%)=NR-(NOS+NR)/None

NR (%) = NOS- (NOS + NR)/Ninguno

NOS (%) = NR- (NOS + NR)/Ninguno
